# Supplementary material for: Legionella DotM structure reveals a role in effector recruiting to the Type 4B secretion system
Source: PubMed Central journal article supplement (PMC5802825; doi:10.1038/s41467-017-02578-x), 2018-02-06
Supplement: 41467_2017_2578_MOESM1_ESM.pdf [file 41467_2017_2578_MOESM1_ESM.pdf]

## Supplementary Information

**Supplementary Figure 1.** Superposition of wild-type, M1, M2, and M4 structures.

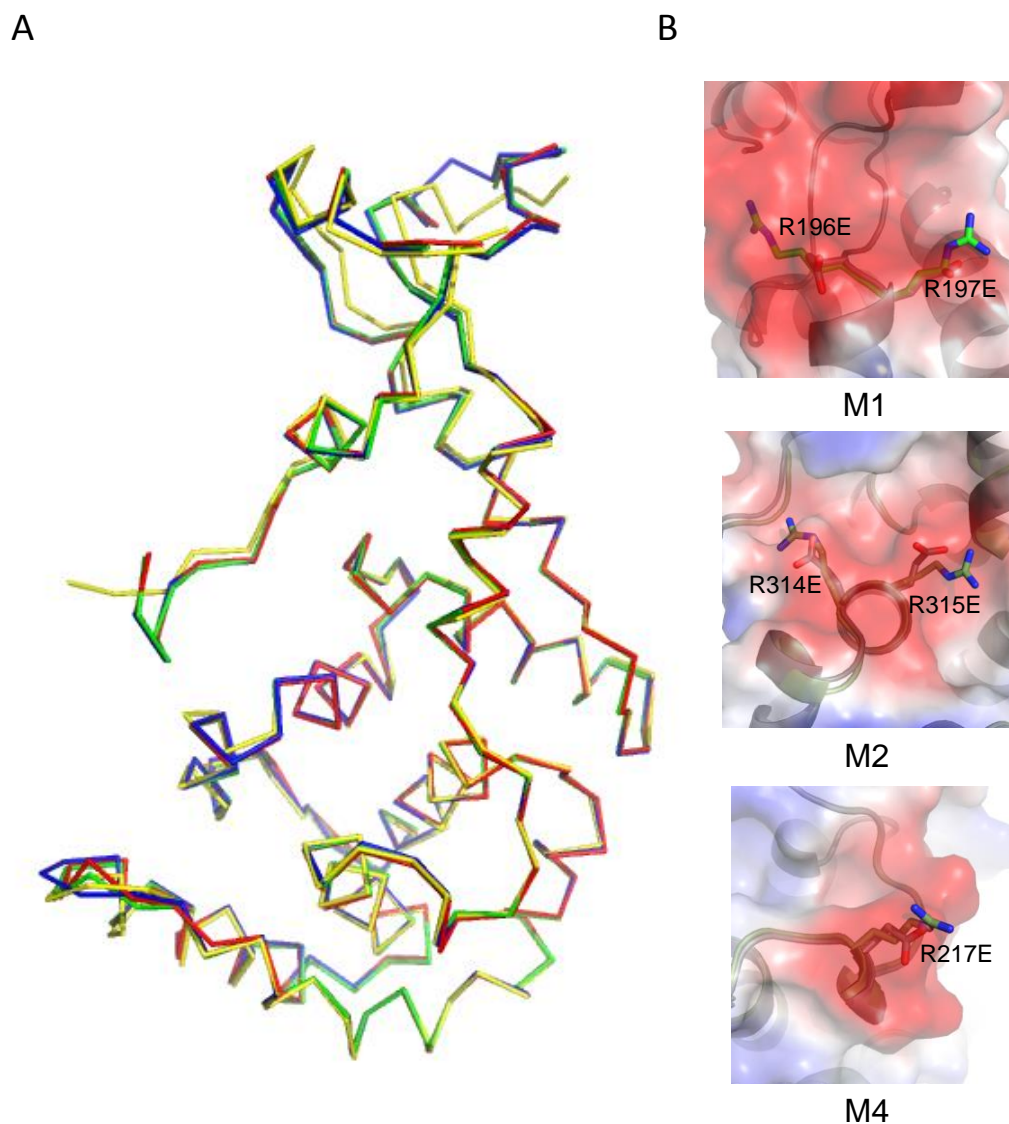

(A) Superposition of wild-type DotM153 structure (green) and its mutants M1 (blue), M2 (yellow) and M4 (red). The structures are shown in ribbon representation. The overall mutant structures are conserved, with minor root-mean-square deviation of 0.149, 0.311 and 0.194 Å, respectively, compared to the wild-type DotM153.

(B) Electrostatic surface representation of DotM153 mutants. Each panel shows the region where M1, M2, and M4 mutations were made. In each, the superposition of the

corresponding mutant and wild-type structures is shown with the backbone structure in cartoon representation and residues mutated in stick representation color coded as in Figure 1C.

**Supplementary Figure 2.** DotM and DotM mutants stability *in vivo* and translocation of full-length Cya-LegC8 fusion by *L.pneumophila* into host eukaryotic cells.

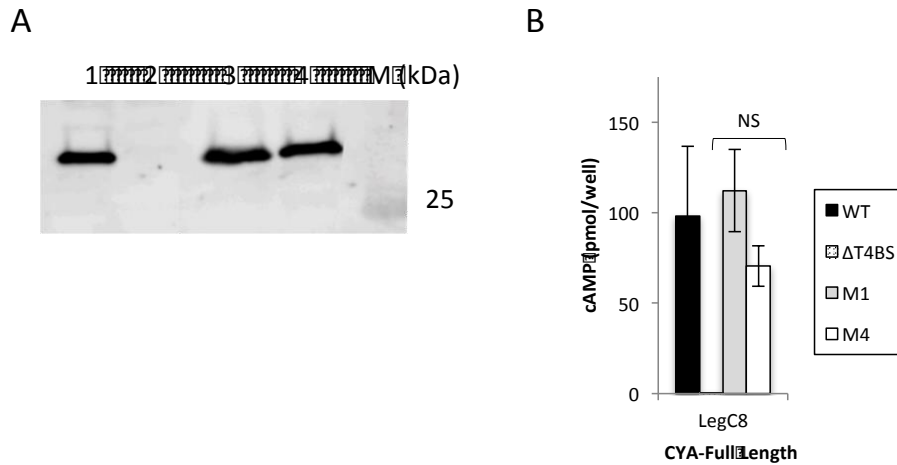

(A) DotM stability in *L.pneumophila* LP01 strains (WT,  $\Delta$ T4BS, M1 and M4, numbered 1-4, respectively). Cells extracts were analysed by Western blotting using DotM specific antibody. M: molecular weight markers. Full gel figures are available in Figure S3.

(B) Translocation of the full-length Cya-LegC8 fusion by *L.pneumophila* into host eukaryotic cells as in Figure 6C.

**Supplementary Figure 3.** Full gels used in this study. Rectangles show the parts of the gels used in making the figures. The corresponding figures in which these parts are used are named under the rectangles.

**A**

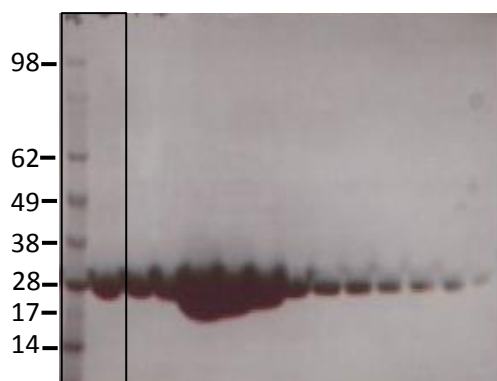

Figure 1B

**B**

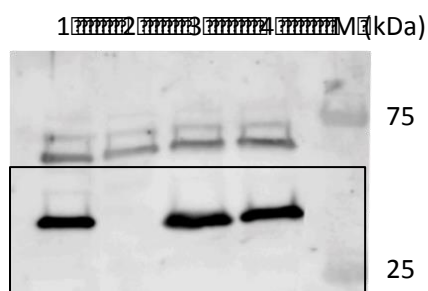

Supplementary Figure 2A

(A) Gel used to make Figure 1B.

(B) Gel used to make Figure S2A.

**Supplementary Table 1:** Strains, primers and plasmids used in this study

**a. Strains used in this study**

| Strain                                                          | Description and Reference                                                                                                                                                          |
|-----------------------------------------------------------------|------------------------------------------------------------------------------------------------------------------------------------------------------------------------------------|
| <b><i>E. coli</i> K12 strains used in this study</b>            |                                                                                                                                                                                    |
| <i>E. coli</i> BL21(DE3) BLR                                    | F <sup>-</sup> <i>ompT hsdS<sub>B</sub>(r<sub>B</sub><sup>-</sup> m<sub>B</sub><sup>-</sup>) gal dcm</i> (DE3) Δ( <i>srl-recA</i> )306::Tn 10 (Tet <sup>R</sup> ) (Merck milipore) |
| <i>E. coli</i> DH5α                                             | <i>fhuA2 Δ(argF-lacZ)U169 phoA glnV44 Φ80 Δ(lacZ)M15 gyrA96 recA1 relA1 endA1 thi-1 hsdR17</i> (NEB)                                                                               |
| <i>E. coli</i> DH5α λpir                                        | sup E44, Δ <i>lacU</i> 169 (Φ <i>lacZ</i> ΔM15), <i>recA1</i> , <i>endA1</i> , <i>hsdR17</i> , <i>thi-1</i> , <i>gyrA96</i> , <i>relA1</i> , λpir phage lysogen (Zuckman 1999)     |
| <i>E. coli</i> CR019                                            | MT607 <i>E. coli</i> containing plasmid pRK600; ColE1 replicon with RK2 transfer genes, Cm <sup>R</sup> (Hubber 2014)                                                              |
| <b><i>Legionella pneumophila</i> strains used in this study</b> |                                                                                                                                                                                    |
| Lp01                                                            | Strep <sup>R</sup> , <i>Legionella pneumophila</i> serogroup 1, Lp01 <i>rpsL</i>                                                                                                   |
| ΔT4BS                                                           | Strep <sup>R</sup> , Lp01 chromosomal deletions of three loci: <i>icmX-dotA</i> , <i>dotB-dotD</i> , and <i>icmT-dotU</i>                                                          |
| M1                                                              | Strep <sup>R</sup> , Lp01 <i>dotMR</i> 196E/R197E                                                                                                                                  |
| M4                                                              | Strep <sup>R</sup> , Lp01 <i>dotMR</i> 217E                                                                                                                                        |
| Lp01 CegC3 <sub>Cter</sub>                                      | Strep <sup>R</sup> , CM <sup>R</sup> , Lp01 + pCYA-CegC3 <sub>Cter</sub>                                                                                                           |
| Lp01 Lpg1663 <sub>Cter</sub>                                    | Strep <sup>R</sup> , CM <sup>R</sup> , Lp01 + pCYA-Lpg1663 <sub>Cter</sub>                                                                                                         |
| Lp01 OSM <sub>Cter</sub>                                        | Strep <sup>R</sup> , CM <sup>R</sup> , Lp01 + pCYA-OSM <sub>Cter</sub>                                                                                                             |
| Lp01 LegC8 <sub>Cter</sub>                                      | Strep <sup>R</sup> , CM <sup>R</sup> , Lp01 + pCYA-LegC8 <sub>Cter</sub>                                                                                                           |
| Lp01 Lem21 <sub>Cter</sub>                                      | Strep <sup>R</sup> , CM <sup>R</sup> , Lp01 + pCYA-Lem21 <sub>Cter</sub>                                                                                                           |
| Lp01 Cya                                                        | Strep <sup>R</sup> , CM <sup>R</sup> , Lp01 + pCYA                                                                                                                                 |
| M1 CegC3 <sub>Cter</sub>                                        | Strep <sup>R</sup> , CM <sup>R</sup> , M1 + pCYA-CegC3 <sub>Cter</sub>                                                                                                             |
| M1 Lpg1663 <sub>Cter</sub>                                      | Strep <sup>R</sup> , CM <sup>R</sup> , M1 + pCYA-Lpg1663 <sub>Cter</sub>                                                                                                           |
| M1 OSM <sub>Cter</sub>                                          | Strep <sup>R</sup> , CM <sup>R</sup> , M1 + pCYA-OSM <sub>Cter</sub>                                                                                                               |
| M1 LegC8 <sub>Cter</sub>                                        | Strep <sup>R</sup> , CM <sup>R</sup> , M1 + pCYA-LegC8 <sub>Cter</sub>                                                                                                             |
| M1 Lem21 <sub>Cter</sub>                                        | Strep <sup>R</sup> , CM <sup>R</sup> , M1 + pCYA-Lem21 <sub>Cter</sub>                                                                                                             |
| M5 CegC3 <sub>Cter</sub>                                        | Strep <sup>R</sup> , CM <sup>R</sup> , M5 + pCYA-CegC3 <sub>Cter</sub>                                                                                                             |
| M5 Lpg1663 <sub>Cter</sub>                                      | Strep <sup>R</sup> , CM <sup>R</sup> , M5 + pCYA-Lpg1663 <sub>Cter</sub>                                                                                                           |
| M5 OSM <sub>Cter</sub>                                          | Strep <sup>R</sup> , CM <sup>R</sup> , M5 + pCYA-OSM <sub>Cter</sub>                                                                                                               |
| M5 LegC8 <sub>Cter</sub>                                        | Strep <sup>R</sup> , CM <sup>R</sup> , M5 + pCYA-LegC8 <sub>Cter</sub>                                                                                                             |
| M5 Lem21 <sub>Cter</sub>                                        | Strep <sup>R</sup> , CM <sup>R</sup> , M5 + pCYA-Lem21 <sub>Cter</sub>                                                                                                             |
| ΔT4BS CegC3 <sub>Cter</sub>                                     | Strep <sup>R</sup> , CM <sup>R</sup> , M5 + pCYA-CegC3 <sub>Cter</sub>                                                                                                             |
| ΔT4BS OSM <sub>Cter</sub>                                       | Strep <sup>R</sup> , CM <sup>R</sup> , M5 + pCYA-OSM <sub>Cter</sub>                                                                                                               |
| ΔT4BS LegC8 <sub>Cter</sub>                                     | Strep <sup>R</sup> , CM <sup>R</sup> , M5 + pCYA-LegC8 <sub>Cter</sub>                                                                                                             |
| <b>Eukaryotic cell lines used in this study</b>                 |                                                                                                                                                                                    |
| J774.1A                                                         | Macrophage from <i>Mus musculus</i> (ATCC TIB-67)                                                                                                                                  |
| CHO FcyRII                                                      | Chinese hamster ovary expressing FcyRII (Nagai 2005)                                                                                                                               |
| <i>Acanthamoeba castellanii</i>                                 | ATCC 30234                                                                                                                                                                         |

<sup>a</sup>antibiotic resistance: Cm, chloramphenicol; Strep, streptomycin

## b. Plasmids used in this study

| Construct                    | Description and Reference                                                                                                                     | Primers     |             |
|------------------------------|-----------------------------------------------------------------------------------------------------------------------------------------------|-------------|-------------|
|                              |                                                                                                                                               | Forward     | Reverse     |
| pETM-41                      | Km <sup>R</sup> ; pBR322 (G.Stier)                                                                                                            |             |             |
| pETM-41Lin                   | Linearize pETM-41 with In-Fusion to yield N' [6His] open vector                                                                               | PT001F      | PT004R      |
| pCC10                        | Km <sup>R</sup> ; [6His]DotM from <i>L.pneumophila</i> encoding residues 119-380 cloned into pETM-41Lin backbone (this study)                 | T4C12047F   | T4C12043R   |
| pCC10Lin                     | Linearize pCC10 with In-Fusion to yield N' [6Hispcs] open vector                                                                              | PT001F      | BD001R      |
| pCC12                        | Km <sup>R</sup> ; CC10Lin with [6Hispcs]DotM from <i>L.pneumophila</i> encoding residues 119-371 (this study)                                 | T4C12054F   | T4C12055R   |
| pCC16                        | Km <sup>R</sup> ; pCC10Lin with [6Hispcs]DotM from <i>L.pneumophila</i> encoding residues 153-380 (this study)                                | T4C12057F   | T4C12043R   |
| pCCP39                       | Km <sup>R</sup> ; pCC16 derivative encoding A R196E/R197E double mutation (this study)                                                        | T4C12076M1F | T4C12077M1R |
| pCCP41                       | Km <sup>R</sup> ; pCC16 derivative encoding A R314E/R315E double mutation (this study)                                                        | T4C12080M2F | T4C12081M2R |
| pCCP42                       | Km <sup>R</sup> ; pCC16 derivative encoding A R347E/R348E double mutation (this study)                                                        | T4C12082M3F | T4C12083M3R |
| pCCP43                       | Km <sup>R</sup> ; pCC16 derivative encoding A R217E mutation (this study)                                                                     | T4C12093M4F | T4C12094M4R |
| pCCP44                       | Km <sup>R</sup> ; pCC16 derivative encoding A R262E mutation (this study)                                                                     | T4C12095M5F | T4C12096M5R |
| pSR47S                       | Km <sup>R</sup> ; (J.J Merriam 1997)                                                                                                          |             |             |
| pSR47S-Lin                   | Linearize pSR47S with In-Fusion to yield an open vector                                                                                       | P47SF       | P47SR       |
| pSR47S-MI                    | Km <sup>R</sup> ; Full length DotM from <i>L.pneumophila</i> with 1000bp upstream and downstream cloned into pSR47S-Lin backbone (this study) | T4C12087CF  | T4C12088DR  |
| pSR47S-DotM <sub>mut1</sub>  | Km <sup>R</sup> ; pSR47S-MI derivative encoding A R196E/R197E double mutation (this study)                                                    | T4C12076M1F | T4C12077M1R |
| pSR47S-DotM <sub>mut2</sub>  | Km <sup>R</sup> ; pSR47S-MI derivative encoding A R314E/R315E double mutation (this study)                                                    | T4C12080M2F | T4C12081M2R |
| pSR47S-DotM <sub>mut4</sub>  | Km <sup>R</sup> ; pSR47S-MI derivative encoding A R217E mutation (this study)                                                                 | T4C12093M4F | T4C12094M4R |
| pCYA                         | Cm <sup>R</sup> ; Cya domain cloned into pMMB207 (ATCC®37809) (Nagai 2005)                                                                    |             |             |
| pCYA-CegC3 <sub>Cter</sub>   | Cm <sup>R</sup> ; Linearize pCya with last C-terminal 30 a.a. of [Cya]CegC3 from <i>L.pneumophila</i> (this study)                            | PCya002F    | PCya001R    |
| pCYA-Lpg1663 <sub>Cter</sub> | Cm <sup>R</sup> ; Linearize pCya with last C-terminal 30 a.a. of Lpg1663 from <i>L.pneumophila</i> (this study)                               | PCya003F    | PCya001R    |
| pCYA-OSM <sub>Cter</sub>     | Cm <sup>R</sup> ; Linearize pCya with last C-terminal 30 a.a. of OSM synthetic sequence (this study)                                          | PCya005F    | PCya001R    |
| pCYA-LegC8 <sub>Cter</sub>   | Cm <sup>R</sup> ; Linearize pCya with last C-terminal 30 a.a. of LegC8 from <i>L.pneumophila</i> (this study)                                 | PCya008F    | PCya001R    |
| pCYA-Lem21 <sub>Cter</sub>   | Cm <sup>R</sup> ; Linearize pCya with last C-terminal 30 a.a. of Lem21 from <i>L.pneumophila</i> (this study)                                 | PCya007F    | PCya001R    |

Pcs= HRV-3C protease cleavage site

<sup>a</sup>antibiotic resistance: Cm, chloramphenicol; Km, kanamycin; Strept, streptomycine.

### c. Primers used in this study

| <b>Primer for cloning</b>         |                                                                                                                                               |
|-----------------------------------|-----------------------------------------------------------------------------------------------------------------------------------------------|
| <b>Primer name</b>                | <b>Primer sequence 5'-3'</b>                                                                                                                  |
| PT001F                            | taacaaagcccgaaaggaagctgagttg                                                                                                                  |
| PT004R                            | gtgatggtgatggtgatgtttcatgtatatctc                                                                                                             |
| BD001R                            | ccctggaacagaacttccagggcgccgtgatggtgatggtgatgtttcatgg                                                                                          |
| P47SF                             | ggatcccccgggctgcaggaattcg                                                                                                                     |
| P47SR                             | ccactagttctagagcggcgcc                                                                                                                        |
| T4C12043                          | tcctttcgggctttgttatggctctaattcctccattgacgtggtg                                                                                                |
| T4C12047                          | caccatcaccatcacgctaaataatcgcaaaacctatgatatgaaaagttgagg                                                                                        |
| T4C12054                          | gttctgttccaggggcccagcggcggtggcgcgaaatcgcaaaacctatgatatgaaaagttgagg                                                                            |
| T4C12055                          | tcctttcgggctttgttatgtaaatctcacctctttactgcaattccag                                                                                             |
| T4C12056                          | cattatatctccttcttatgtaaatctcacctctttactgcaattccag                                                                                             |
| T4C12057                          | gttctgttccaggggcccagcggcggtggcgcgacgtcaataaagggccttgggcaatggc                                                                                 |
| T4C12087CF                        | ctctagaactagtggttgcaaggctgttagcttaatcccggag                                                                                                   |
| T4C12088DR                        | cagcccggggatccgttactagtttggaatggttcaatatgacg                                                                                                  |
| <b>Primers for mutagenesis</b>    |                                                                                                                                               |
| <b>Primer name</b>                | <b>Primer sequence 5'-3'</b>                                                                                                                  |
| T4C12076M1F                       | gagatgacagcggggatt <b>GAAGAA</b> ggcgtatgccaacgag                                                                                             |
| T4C12077M1R                       | ctcgtttggcatcgcc <b>TTCTTC</b> aatccccgctgtcatctc                                                                                             |
| T4C12080M2F                       | ggctcaaaccagtcgac <b>GAAGAA</b> ttatggtatatgttg                                                                                               |
| T4C12081M2R                       | caacataaccataa <b>TTCTTC</b> gtcgactggttgagcc                                                                                                 |
| T4C12082M3F                       | gaaaaggaaatggga <b>GAAGAA</b> tctttggtgccaatgatag                                                                                             |
| T4C12083M3R                       | ctatcattggcaccaaaga <b>TTCTTC</b> tccatttcctttc                                                                                               |
| T4C12093M4F                       | ccttattgggatggtttgaa <b>GA</b> tgctct cctcaggcttacgc                                                                                          |
| T4C12094M4R                       | gcgtaagcctgaggagagca <b>TTC</b> tcaaaacctcccaataagg                                                                                           |
| T4C12095M5F                       | gggaaacctgattttctgttgca <b>GA</b> accagtaatgaaaaataccaaaac                                                                                    |
| T4C12096M5R                       | gttttggtatttttctactgtg <b>TCT</b> gcaacagaaaaatcaggttccc                                                                                      |
| <b>Primers for Cya constructs</b> |                                                                                                                                               |
| <b>Primer name</b>                | <b>Primer sequence 5'-3'</b>                                                                                                                  |
| PCya001R                          | cgcgccaccgctgtcatagccggaatcctggcgttcc                                                                                                         |
| PCya002F                          | agcggcgggtggcgcggaagaaaaagaagaagcagaattttcatcttctgaatcagaaaatgaagaaaaag<br>aagaagaaaacgaagaatcaagccgtttacaatgtaactgcaggcatgcaagcttggctgtttg   |
| PCya003F                          | agcggcgggtggcgcgcctatgctgagcctaaagttgtatcagaagacaaagcggaatctgaagaagagaa<br>cgaagatgaagagtcaagaaactcggcctcagtttaactgcaggcatgcaagcttggctgtttg   |
| PCya005F                          | agcggcgggtggcgcgttattattgtattatttagcagcgtatgtgctgctggaagaagaagaagaaga<br>agaaagcagcctgctgagcagcctgaaactgtaactgcaggcatgcaagcttggctgtttg        |
| PCya007F                          | agcggcgggtggcgcg<br>ttgcaatattgtccaggcattttacttctcttaataaaactagcatctgttttagaagtgcaa ttggttccaacagat<br>atgttccttagctgcaggcatgcaagcttggctgtttg |
| PCya008F                          | agcggcgggtggcgcgata<br>acttctcagaagaagttgagcgtacacaatccctgcaacggatggcttgagttggatgcctagtgagcaag<br>cacgattacaaaataactgcaggcatgcaagcttggctgtttg |

bold: desired mutation
